# Supplementary material for: Changing substrate specificity and iteration of amino acid chain elongation in glucosinolate biosynthesis through targeted mutagenesis of Arabidopsis methylthioalkylmalate synthase 1
Source: PubMed Central journal article supplement (PMC6603273; doi:10.1042/bsr20190446), 2019-07-02
Supplement: BSR20190446_Supp1.pdf [file BSR20190446_Supp1.pdf]

|                                                             |        |   |
|-------------------------------------------------------------|--------|---|
| Arabidopsis thaliana Col-0 (NP_001330047.1) AtMAM1          | LTIGA  | 5 |
| Arabidopsis thaliana mt-0 (AJ486884.1) AtmMAM1              | LTIGA  | 5 |
| Arabidopsis thaliana sorbo (CAD31141.1) AtsMAM1             | LTIGA  | 5 |
| Arabidopsis thaliana Br-0 (1001 genomes 6904) AtbMAM1       | LSIGA  | 5 |
| Brassica oleracea var. oleracea (XP_013618041.1) BooMAM1.1  | VACPS  | 5 |
| Brassica napus (XP_013678219.1) BnMAM1.1                    | VACPS  | 5 |
| Brassica rapa (XP_009130133.1) BrMAM1.1                     | VACPS  | 5 |
| Eruca vesicaria subsp. sativa (AGS49163.1) EvsMAM           | LACPS  | 5 |
| Arabidopsis thaliana Col-0 (NP_173285.2) AtIPMS1            | HNIPS  | 5 |
| Arabidopsis thaliana Col-0 (NP_177544.1) AtIPMS2            | HNIPS  | 5 |
| Brassica napus (XM_013817468.2) BnMAM1.2                    | INIGS  | 5 |
| Brassica rapa (XM_009138151.2) BrMAM1.2                     | INIGS  | 5 |
| Brassica rapa subsp. pekinensis (ACR10246.1) BrpMAM.1       | INIGS  | 5 |
| Raphanus sativus (XM_018606131.1) RsMAM1.2                  | LNLSGS | 5 |
| Arabidopsis thaliana Ler-0 (Q8VX04.1) AtMAM2                | LNVAS  | 5 |
| Arabidopsis cebennensis (CAJ55509.1) AcMAMA                 | LNVAS  | 5 |
| Arabidopsis lyrata lyrata (XP_002872029.1) AllMAM2          | LNVAS  | 5 |
| Arabidopsis lyrata petraea (CAJ55506.1) AlpMAMA             | LNVAS  | 5 |
| Eutrema salsugineum (XP_006394566.2) EsMAM2                 | LNVAS  | 5 |
| Camelina sativa (XP_010493409.1) CsMAM2.1                   | LNVAS  | 5 |
| Camelina sativa (XP_010421098.1) CsMAM2.2                   | LNVAS  | 5 |
| Camelina sativa (XP_010454580.1) CsMAM1                     | LNVAS  | 5 |
| Boechera divaricarpa (CAJ55512.1) BdMAMA                    | LNVAS  | 5 |
| Capsella rubella (XP_006289820.1) CrMAM2                    | LNVAS  | 5 |
| Brassica oleracea var. oleracea (XP_013593685.1) BooMAM2    | LNVAS  | 5 |
| Brassica napus (XP_013730921.2) BnMAM2                      | LNVAS  | 5 |
| Raphanus sativus (XP_018477323.1) RsMAM2                    | LNVAS  | 5 |
| Eutrema salsugineum (XP_006394567.1) EsMAM1                 | LNIAS  | 5 |
| Brassica rapa (XM_009138149.2) BrMAM1.4                     | LNLAS  | 5 |
| Brassica rapa subsp. pekinensis (ACR10248.1) BrpMAM.2       | LNLAS  | 5 |
| Brassica oleracea var. oleracea (XM_013763569.1) BooMAM1.2  | FTLAS  | 5 |
| Brassica rapa (XM_009146283.2) BrMAM1.3                     | FTLAS  | 5 |
| Raphanus sativus (XP_018457526.1) RsMAM1.1                  | FTLAS  | 5 |
| Arabidopsis lyrata lyrata (CAJ55517.1) AllMAMc.1            | CCIAS  | 5 |
| Arabidopsis lyrata subsp. lyrata (XP_020879218.1) AllMAM3.2 | CCIAS  | 5 |
| Arabidopsis lyrata subsp. lyrata (EFH48290.1) AllMAMc.2     | CCIAS  | 5 |
| Arabidopsis lyrata petraea (CAJ55508.1) AlpMAMc             | CCIAS  | 5 |
| Camelina sativa (XP_019083909.1) CsMAM3.3                   | CCIAS  | 5 |
| Capsella rubella (XP_006289994.1) CrMAM1                    | CCIAS  | 5 |
| Arabidopsis cebennensis (CAJ55511.1) AcMAMc                 | CCIAS  | 5 |
| Boechera divaricarpa (CAJ55514.1) BdMAMc                    | CCIAS  | 5 |
| Camelina sativa (XP_010493411.1) CsMAM3.1                   | CCIAS  | 5 |
| Camelina sativa (XP_010454582.1) CsMAM3.7                   | CCIAS  | 5 |
| Capsella rubella (XM_006289411.2) CrMAM3.2                  | CCVAG  | 5 |
| Camelina sativa (XM_010473736.2) CsMAM3.4                   | GGFAG  | 5 |
| Camelina sativa (XM_010418504.2) CsMAM3.5                   | GGFAG  | 5 |
| Capsella rubella (XM_006301203.2) CrMAM3.3                  | IGFAG  | 5 |
| Camelina sativa (XM_010430647.2) CsMAM3.6                   | IGFAG  | 5 |
| Boechera divaricarpa (CAJ55513.1) BdMAMB                    | IGFAA  | 5 |
| Arabidopsis lyrata lyrata (XP_002872030.1) AllMAM3.1        | LGFAA  | 5 |
| Arabidopsis lyrata subsp. petraea (CAJ55507.1) AlpMAMB      | LGFAA  | 5 |
| Arabidopsis cebennensis (CAJ55510.1) AcMAMB                 | IGFAT  | 5 |
| Arabidopsis thaliana Col-0 (NP_197693.1) AtMAM3             | MGFAA  | 5 |
| Arabidopsis thaliana Br-0 (1001 genomes 6904) AtbMAM3       | MGFAA  | 5 |
| Arabidopsis thaliana Ler-0 (1001 genomes 7213) AtlMAM3      | MGFAA  | 5 |
| Arabidopsis thaliana sorbo (AJ486943.1) AtsMAM3             | MGFAA  | 5 |
| Camelina sativa (XP_010421099.1) CsMAM3.2                   | TGFAA  | 5 |
| Camelina sativa (XP_010493410.1) CsMAM3.8                   | TGFAA  | 5 |
| Capsella rubella (XP_006290200.1) CrMAM3.1                  | TGFAA  | 5 |

|           | 1  | 2   | 3      | 4     | 5     | 6     | 7     | 8     | 9     | 10    | 11    | 12    | 13    | 14    | 15    | 16    | 17    | 18    | 19    | 20    | 21    | 22    | 23    | 24    | 25    | 26    | 27    | 28    | 29    | 30    | 31    | 32    | 33    | 34    | 35    | 36    | 37    | 38    | 39    | 40    | 41    | 42    | 43    | 44    | 45    | 46    | 47    | 48    | 49    | 50    | 51    | 52    | 53    | 54    | 55    | 56    | 57    |       |
|-----------|----|-----|--------|-------|-------|-------|-------|-------|-------|-------|-------|-------|-------|-------|-------|-------|-------|-------|-------|-------|-------|-------|-------|-------|-------|-------|-------|-------|-------|-------|-------|-------|-------|-------|-------|-------|-------|-------|-------|-------|-------|-------|-------|-------|-------|-------|-------|-------|-------|-------|-------|-------|-------|-------|-------|-------|-------|-------|
| AMAM1     | 1  |     | 100.00 | 99.41 | 95.45 | 92.11 | 92.11 | 91.32 | 85.85 | 86.05 | 82.09 | 87.82 | 85.32 | 75.55 | 79.49 | 79.53 | 79.96 | 79.61 | 79.84 | 79.65 | 73.59 | 79.06 | 75.73 | 77.60 | 77.80 | 77.21 | 77.80 | 79.02 | 77.76 | 75.49 | 76.67 | 73.92 | 75.98 | 69.85 | 77.56 | 77.56 | 76.97 | 77.17 | 76.97 | 79.33 | 75.59 | 77.17 | 75.83 | 72.05 | 71.65 | 70.67 | 71.71 | 72.62 | 72.82 | 65.94 | 60.89 | 60.95 | 60.75 | 76.32 | 75.93 | 76.22 | 45.31 | 44.70 |
| AtMAM1    | 2  | 0   |        | 99.41 | 95.45 | 92.11 | 92.11 | 91.32 | 85.85 | 86.05 | 82.09 | 87.82 | 85.32 | 75.55 | 79.49 | 79.53 | 79.96 | 79.61 | 79.84 | 79.65 | 73.59 | 79.06 | 75.73 | 77.60 | 77.80 | 77.21 | 77.80 | 79.02 | 77.76 | 75.49 | 76.67 | 73.92 | 75.98 | 69.85 | 77.56 | 77.56 | 76.97 | 77.17 | 76.97 | 79.33 | 75.59 | 77.17 | 75.83 | 72.05 | 71.65 | 70.67 | 71.71 | 72.62 | 72.82 | 65.94 | 60.89 | 60.95 | 60.75 | 76.32 | 75.93 | 76.22 | 45.31 | 44.70 |
| AtsMAM1   | 3  | 3   | 3      |       | 95.26 | 91.91 | 91.91 | 91.12 | 86.05 | 86.05 | 81.89 | 87.82 | 85.32 | 75.55 | 79.49 | 79.53 | 80.15 | 79.61 | 80.04 | 79.84 | 73.77 | 79.26 | 75.73 | 78.00 | 78.19 | 77.60 | 78.19 | 79.02 | 78.15 | 75.69 | 76.86 | 74.12 | 76.17 | 70.22 | 77.76 | 77.76 | 77.17 | 77.36 | 77.17 | 79.53 | 75.79 | 77.36 | 75.83 | 72.24 | 71.85 | 70.87 | 72.10 | 72.62 | 72.82 | 65.94 | 60.89 | 60.95 | 60.75 | 76.52 | 76.13 | 76.41 | 45.31 | 44.70 |
| AMAM2     | 4  | 23  | 23     | 24    |       | 93.69 | 93.69 | 92.90 | 87.03 | 87.23 | 82.87 | 88.41 | 86.69 | 76.65 | 80.66 | 80.12 | 81.09 | 79.41 | 79.26 | 79.06 | 73.22 | 78.47 | 74.95 | 78.59 | 78.78 | 78.19 | 78.78 | 80.00 | 78.74 | 75.10 | 76.47 | 73.92 | 75.59 | 69.85 | 75.79 | 75.98 | 75.20 | 74.61 | 74.41 | 77.56 | 74.41 | 75.79 | 74.66 | 71.06 | 70.67 | 70.47 | 71.51 | 71.46 | 71.65 | 65.35 | 61.28 | 61.54 | 61.34 | 75.34 | 74.95 | 75.24 | 44.69 | 43.93 |
| AIIMAM2   | 5  | 40  | 40     | 41    | 32    |       | 99.21 | 96.84 | 88.80 | 88.61 | 84.84 | 90.37 | 88.45 | 77.57 | 81.45 | 81.73 | 82.06 | 80.63 | 78.91 | 78.71 | 72.73 | 77.73 | 74.41 | 78.04 | 78.24 | 77.65 | 78.24 | 80.43 | 77.80 | 74.76 | 76.52 | 73.78 | 75.44 | 69.54 | 76.62 | 76.82 | 76.03 | 75.64 | 75.44 | 78.19 | 73.48 | 75.05 | 74.31 | 69.94 | 69.16 | 68.96 | 70.59 | 71.51 | 71.71 | 65.03 | 60.97 | 61.22 | 61.02 | 75.39 | 75.00 | 75.68 | 45.00 | 44.55 |
| AlpMAMa   | 6  | 40  | 40     | 41    | 32    | 4     |       | 96.84 | 89.00 | 88.80 | 85.04 | 90.37 | 88.65 | 77.76 | 81.64 | 81.93 | 82.24 | 80.23 | 79.10 | 78.91 | 72.91 | 77.93 | 74.61 | 78.04 | 78.24 | 77.65 | 78.24 | 80.43 | 77.80 | 74.56 | 76.32 | 73.58 | 75.24 | 69.54 | 76.62 | 76.82 | 76.03 | 75.64 | 75.44 | 78.39 | 73.48 | 75.05 | 74.31 | 69.94 | 69.16 | 68.96 | 70.78 | 71.51 | 71.71 | 65.03 | 60.97 | 61.42 | 61.22 | 75.00 | 74.61 | 75.49 | 45.16 | 44.70 |
| AcMAMa    | 7  | 44  | 44     | 45    | 36    | 16    | 16    |       | 88.02 | 87.82 | 83.86 | 89.39 | 87.87 | 76.84 | 80.66 | 80.75 | 81.31 | 79.84 | 78.12 | 77.93 | 71.82 | 76.76 | 74.22 | 77.45 | 77.65 | 77.06 | 77.65 | 80.23 | 77.41 | 74.56 | 75.93 | 73.19 | 75.44 | 69.54 | 75.83 | 76.03 | 75.25 | 74.85 | 74.66 | 77.60 | 73.08 | 74.66 | 74.12 | 69.55 | 68.76 | 68.57 | 70.59 | 71.32 | 71.51 | 64.83 | 61.17 | 60.83 | 60.63 | 74.22 | 73.83 | 74.90 | 44.69 | 44.24 |
| CsMAM2.1  | 8  | 72  | 72     | 71    | 66    | 57    | 56    | 61    |       | 97.42 | 92.06 | 93.45 | 92.13 | 77.39 | 81.45 | 80.94 | 80.93 | 78.54 | 78.52 | 78.32 | 72.18 | 77.15 | 73.63 | 76.67 | 76.86 | 76.27 | 76.86 | 76.91 | 77.67 | 73.39 | 75.34 | 71.82 | 74.07 | 69.17 | 75.25 | 75.44 | 75.64 | 75.83 | 76.03 | 76.62 | 72.69 | 73.92 | 72.94 | 69.17 | 68.38 | 68.18 | 70.61 | 71.07 | 71.26 | 64.82 | 59.88 | 60.79 | 60.79 | 73.87 | 73.28 | 74.07 | 45.62 | 44.55 |
| CsMAM2.2  | 9  | 71  | 71     | 71    | 65    | 58    | 57    | 62    | 13    |       | 92.86 | 93.85 | 92.91 | 77.39 | 81.45 | 80.94 | 80.75 | 78.74 | 79.10 | 78.91 | 73.09 | 77.73 | 73.63 | 77.45 | 77.65 | 77.06 | 77.65 | 77.69 | 78.46 | 73.39 | 75.54 | 72.21 | 74.66 | 69.54 | 74.85 | 75.05 | 75.64 | 76.03 | 76.23 | 77.41 | 72.89 | 74.12 | 73.53 | 69.17 | 68.38 | 68.18 | 70.41 | 71.65 | 71.84 | 65.42 | 60.67 | 61.39 | 61.39 | 74.07 | 73.48 | 74.46 | 45.62 | 44.55 |
| CsMAM1    | 10 | 91  | 91     | 92    | 87    | 77    | 76    | 82    | 40    | 36    |       | 89.09 | 87.99 | 73.53 | 77.34 | 77.01 | 77.20 | 78.31 | 75.64 | 75.44 | 69.29 | 74.07 | 75.56 | 73.14 | 73.33 | 72.75 | 73.33 | 72.99 | 73.91 | 70.45 | 72.02 | 68.88 | 72.02 | 66.79 | 72.10 | 72.30 | 72.69 | 73.08 | 73.28 | 74.26 | 69.74 | 70.78 | 70.00 | 66.60 | 65.81 | 66.00 | 67.86 | 70.75 | 70.75 | 65.11 | 59.96 | 60.20 | 60.20 | 69.74 | 69.16 | 70.57 | 44.20 | 43.73 |
| BdMAM1    | 11 | 62  | 62     | 62    | 59    | 49    | 49    | 54    | 33    | 31    | 55    |       | 92.32 | 78.12 | 82.23 | 82.51 | 81.87 | 80.31 | 80.27 | 80.08 | 73.82 | 78.91 | 75.20 | 78.82 | 79.02 | 78.43 | 79.02 | 78.86 | 79.05 | 74.17 | 76.32 | 73.19 | 75.24 | 70.09 | 75.83 | 76.03 | 76.62 | 76.42 | 76.23 | 78.59 | 73.87 | 74.90 | 74.12 | 69.96 | 69.17 | 68.77 | 71.20 | 72.43 | 72.62 | 66.21 | 61.84 | 61.98 | 61.78 | 75.05 | 74.26 | 74.66 | 45.78 | 45.17 |
| CrMAM2    | 12 | 75  | 75     | 75    | 68    | 59    | 58    | 62    | 40    | 36    | 61    | 39    |       | 76.56 | 80.54 | 79.84 | 79.70 | 78.47 | 78.40 | 78.21 | 72.10 | 76.85 | 73.35 | 76.37 | 76.56 | 75.98 | 76.56 | 76.61 | 77.95 | 72.51 | 74.46 | 72.32 | 73.98 | 69.29 | 75.15 | 75.34 | 75.73 | 75.34 | 75.34 | 77.10 | 72.02 | 72.99 | 72.66 | 69.09 | 68.31 | 68.11 | 70.53 | 70.66 | 70.85 | 64.44 | 59.92 | 60.43 | 60.24 | 72.21 | 71.62 | 72.82 | 45.48 | 44.57 |
| BooMAM2   | 13 | 133 | 133    | 133   | 127   | 122   | 121   | 126   | 123   | 123   | 144   | 119   | 128   |       | 93.15 | 87.22 | 87.82 | 75.46 | 75.41 | 75.23 | 74.95 | 75.41 | 71.01 | 72.79 | 72.98 | 72.43 | 73.35 | 72.66 | 72.56 | 69.72 | 70.83 | 67.71 | 70.28 | 69.33 | 72.19 | 72.38 | 73.11 | 72.19 | 72.01 | 73.11 | 70.53 | 71.32 | 71.14 | 64.94 | 64.21 | 63.84 | 65.19 | 68.49 | 68.67 | 62.92 | 57.95 | 58.04 | 57.86 | 68.50 | 68.13 | 69.53 | 43.60 | 42.88 |
| BnMAM2    | 14 | 105 | 105    | 105   | 99    | 95    | 94    | 99    | 95    | 95    | 116   | 91    | 100   | 37    |       | 91.73 | 84.89 | 79.18 | 79.34 | 79.14 | 73.14 | 79.34 | 74.66 | 76.56 | 76.76 | 76.17 | 77.15 | 76.41 | 76.32 | 73.29 | 74.46 | 71.15 | 73.59 | 68.37 | 75.93 | 76.13 | 77.10 | 75.93 | 75.73 | 76.91 | 74.17 | 75.00 | 74.80 | 68.24 | 67.45 | 67.06 | 68.69 | 72.20 | 72.39 | 66.67 | 61.24 | 61.49 | 61.30 | 71.98 | 71.60 | 73.06 | 45.16 | 44.39 |
| RsMAM2    | 15 | 104 | 104    | 104   | 101   | 93    | 92    | 98    | 97    | 97    | 117   | 89    | 103   | 69    | 42    |       | 84.40 | 79.22 | 79.96 | 79.76 | 73.31 | 79.96 | 75.05 | 76.77 | 76.97 | 76.38 | 77.17 | 76.62 | 76.68 | 73.67 | 74.85 | 72.30 | 73.97 | 68.88 | 76.13 | 76.33 | 77.32 | 75.94 | 75.74 | 76.53 | 74.36 | 75.59 | 75.00 | 68.32 | 67.52 | 66.93 | 68.77 | 71.65 | 71.84 | 65.74 | 60.67 | 61.90 | 61.71 | 71.96 | 71.57 | 73.83 | 45.31 | 45.17 |
| EsMAM2    | 16 | 107 | 107    | 106   | 101   | 96    | 95    | 100   | 102   | 103   | 122   | 97    | 109   | 66    | 81    | 83    |       | 80.41 | 79.44 | 79.25 | 77.88 | 79.25 | 74.39 | 76.59 | 76.78 | 76.22 | 76.97 | 76.45 | 75.80 | 72.52 | 73.64 | 70.65 | 72.90 | 70.02 | 75.23 | 75.42 | 75.23 | 74.67 | 74.48 | 75.98 | 72.05 | 72.66 | 72.47 | 67.60 | 66.85 | 66.85 | 68.22 | 69.81 | 70.00 | 62.92 | 58.07 | 59.10 | 59.10 | 71.46 | 70.90 | 72.86 | 44.29 | 43.86 |
| EsMAM1    | 17 | 104 | 104    | 104   | 105   | 99    | 101   | 103   | 109   | 108   | 108   | 100   | 110   | 134   | 107   | 106   | 105   |       | 77.19 | 77.00 | 70.96 | 76.41 | 75.94 | 75.73 | 75.93 | 75.34 | 75.93 | 75.20 | 75.00 | 71.29 | 72.85 | 70.12 | 73.53 | 66.91 | 74.71 | 74.90 | 74.51 | 73.73 | 73.53 | 75.69 | 72.55 | 73.19 | 74.12 | 69.88 | 69.09 | 68.50 | 68.76 | 75.64 | 75.84 | 68.88 | 63.29 | 65.19 | 64.99 | 71.62 | 71.04 | 73.83 | 44.53 | 44.86 |
| BooMAM1.1 | 18 | 103 | 103    | 102   | 106   | 108   | 107   | 112   | 110   | 107   | 124   | 101   | 111   | 134   | 106   | 102   | 110   | 117   |       | 99.80 | 90.61 | 92.28 | 87.52 | 76.27 | 76.47 | 75.88 | 76.67 | 75.69 | 74.71 | 71.76 | 73.53 | 70.39 | 72.96 | 67.58 | 76.08 | 76.27 | 76.67 | 76.08 | 76.27 | 77.06 | 73.92 | 74.95 | 74.95 | 70.45 | 69.86 | 69.08 | 68.75 | 70.02 | 70.21 | 63.01 | 57.06 | 58.43 | 58.43 | 72.21 | 71.62 | 72.90 | 45.00 | 45.02 |
| BnMAM1.1  | 19 | 104 | 104    | 103   | 107   | 109   | 108   | 113   | 111   | 108   | 125   | 102   | 112   | 135   | 107   | 103   | 111   | 118   | 1     |       | 90.42 | 92.08 | 87.33 | 76.08 | 76.27 | 75.69 | 76.47 | 75.49 | 74.51 | 71.57 | 73.33 | 70.39 | 72.76 | 67.40 | 76.08 | 76.27 | 76.47 | 75.88 | 76.08 | 76.86 | 73.73 | 74.76 | 74.76 | 70.45 | 69.86 | 69.08 | 68.75 | 70.02 | 70.21 | 63.01 | 57.06 | 58.43 | 58.43 | 72.02 | 71.43 | 72.71 | 45.00 | 45.02 |
| BrMAM1.1  | 20 | 145 | 145    | 144   | 147   | 150   | 149   | 155   | 153   | 148   | 168   | 144   | 154   | 138   | 148   | 146   | 121   | 160   | 51    | 52    |       | 86.37 | 80.85 | 70.07 | 70.26 | 69.71 | 70.44 | 69.53 | 68.80 | 66.42 | 67.88 | 64.96 | 66.91 | 66.36 | 69.89 | 70.07 | 70.44 | 69.71 | 69.89 | 70.44 | 67.70 | 68.67 | 68.67 | 65.03 | 64.48 | 63.75 | 63.45 | 64.98 | 65.16 | 58.11 | 52.89 | 53.83 | 54.01 | 66.30 | 65.76 | 67.70 | 42.48 | 42.21 |
| BJPMS1    | 21 | 107 | 107    | 106   | 110   | 114   | 113   | 119   | 117   | 114   | 132   | 108   | 119   | 134   | 106   | 102   | 111   | 121   | 39    | 40    | 74    |       | 86.34 | 76.27 | 76.47 | 75.88 | 76.67 | 75.69 | 75.49 | 71.96 | 73.53 | 70.20 | 72.76 | 67.58 | 75.49 | 75.69 | 76.27 | 75.29 | 75.49 | 76.27 | 74.12 | 75.34 | 75.15 | 70.84 | 70.25 | 69.28 | 68.75 | 69.83 | 70.02 | 62.43 | 56.87 | 57.84 | 57.65 | 71.62 | 71.23 | 73.49 | 45.16 | 44.70 |
| EvMAM     | 22 | 124 | 124    | 124   | 128   | 131   | 130   | 132   | 135   | 135   | 120   | 127   | 137   | 158   | 130   | 127   | 137   | 121   | 63    | 64    | 104   | 69    |       | 73.37 | 73.   |       |       |       |       |       |       |       |       |       |       |       |       |       |       |       |       |       |       |       |       |       |       |       |       |       |       |       |       |       |       |       |       |       |

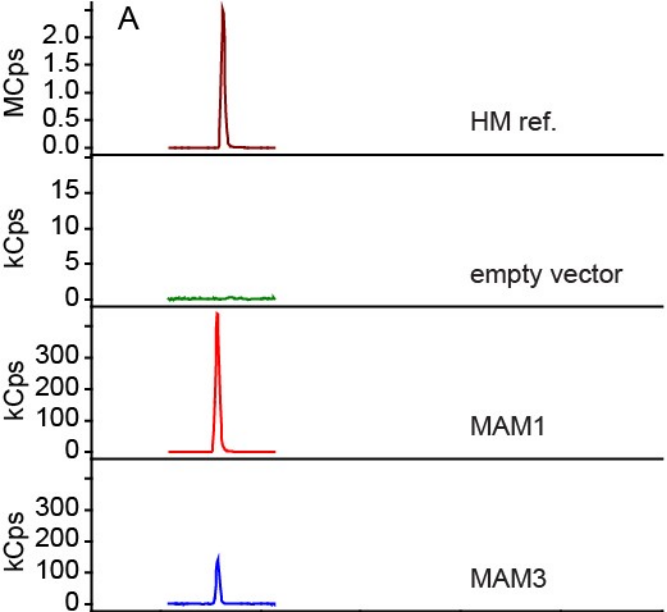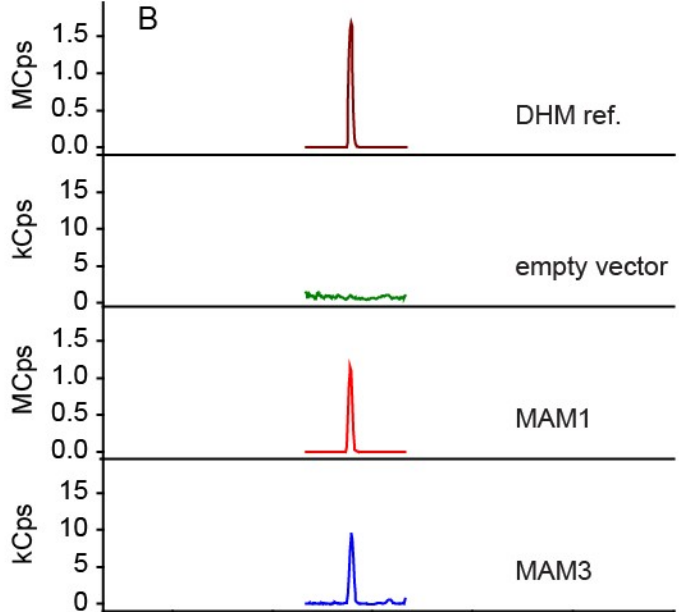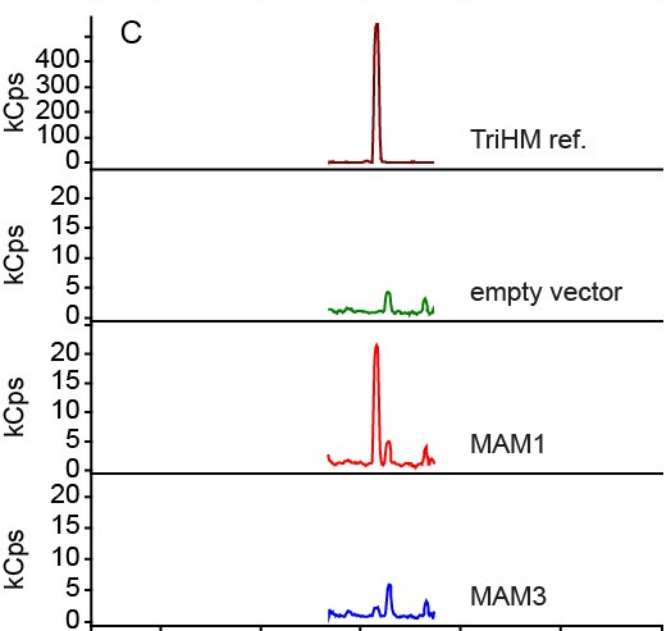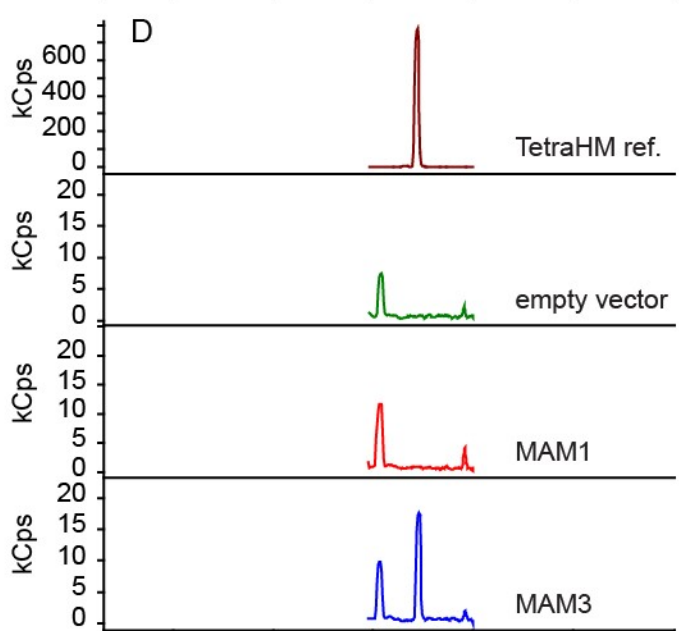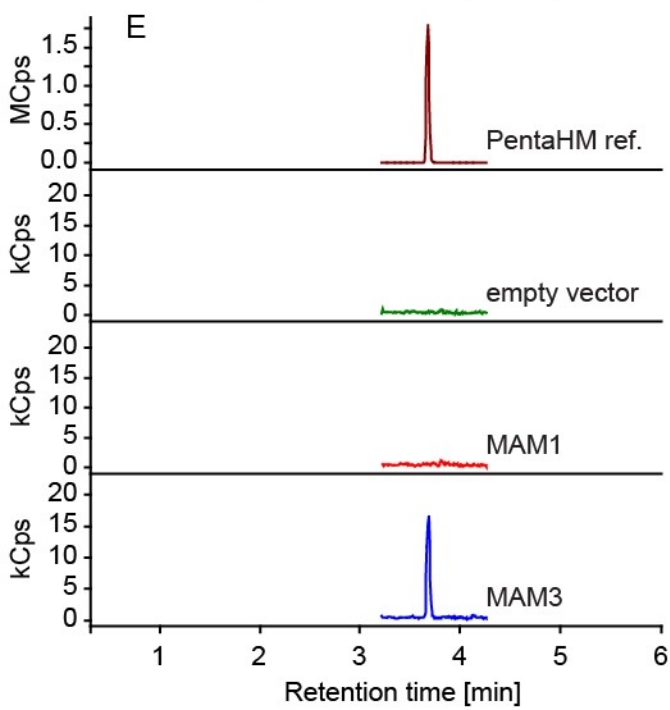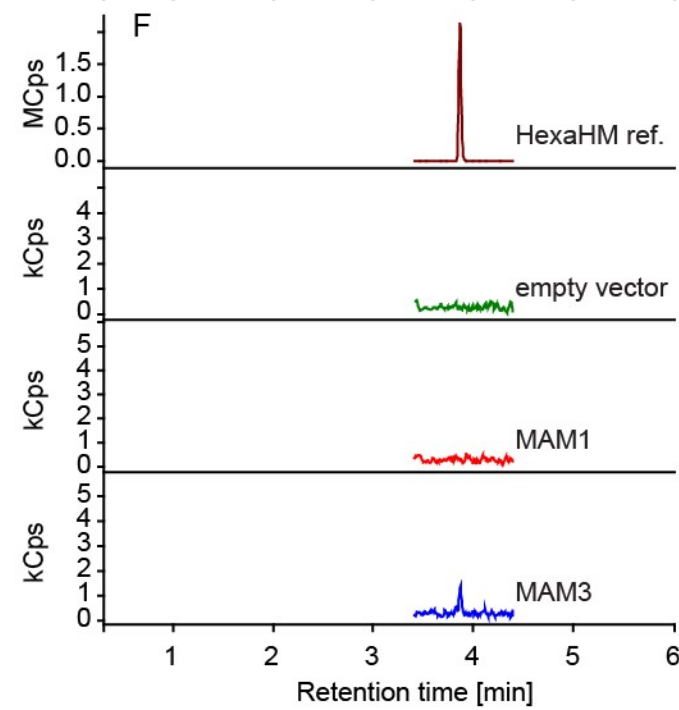

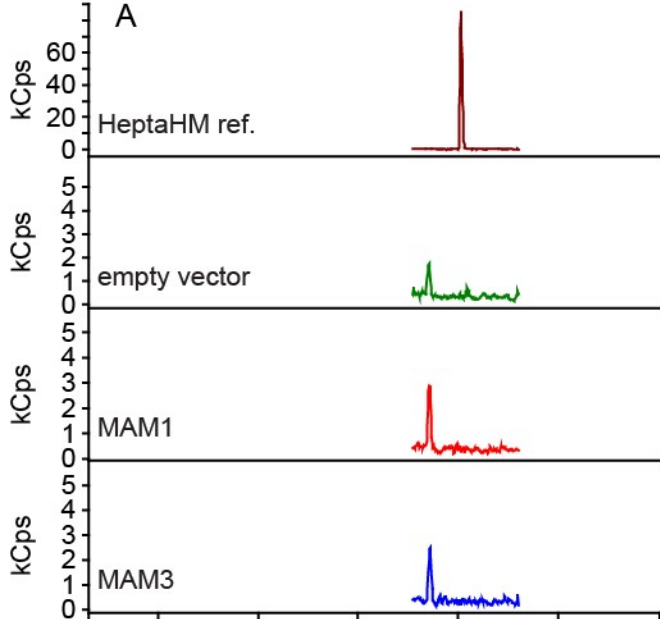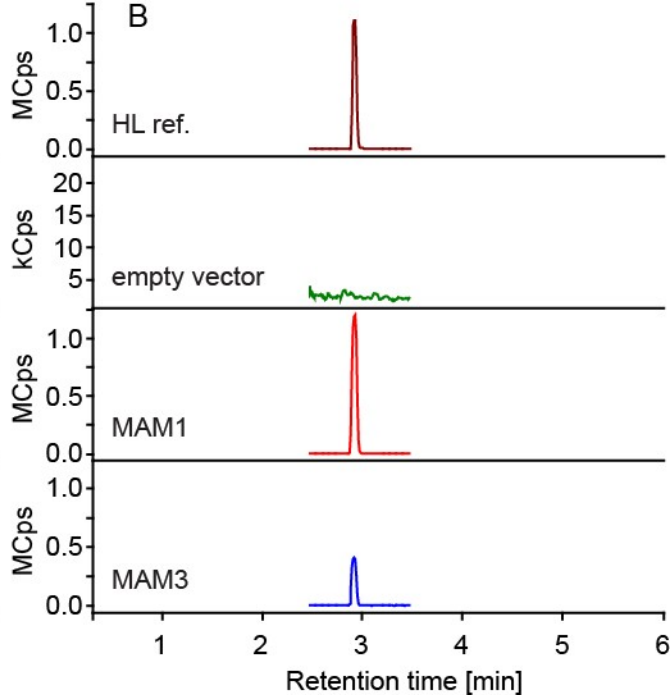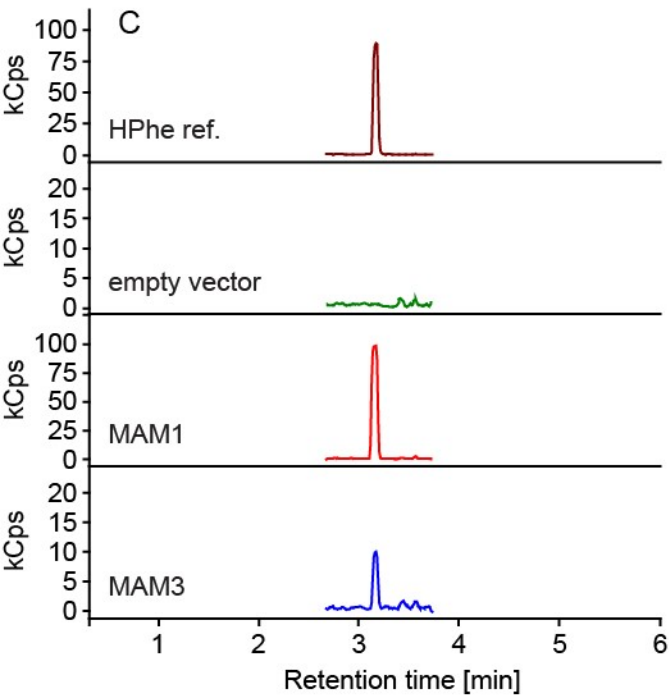

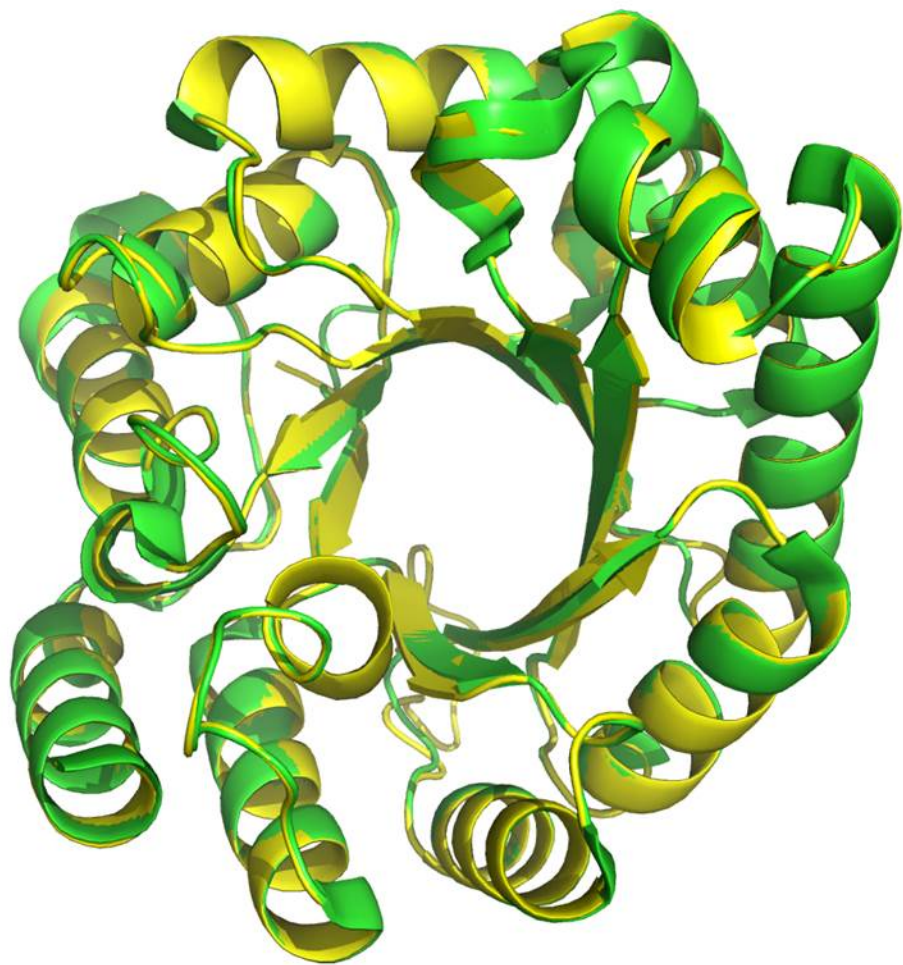

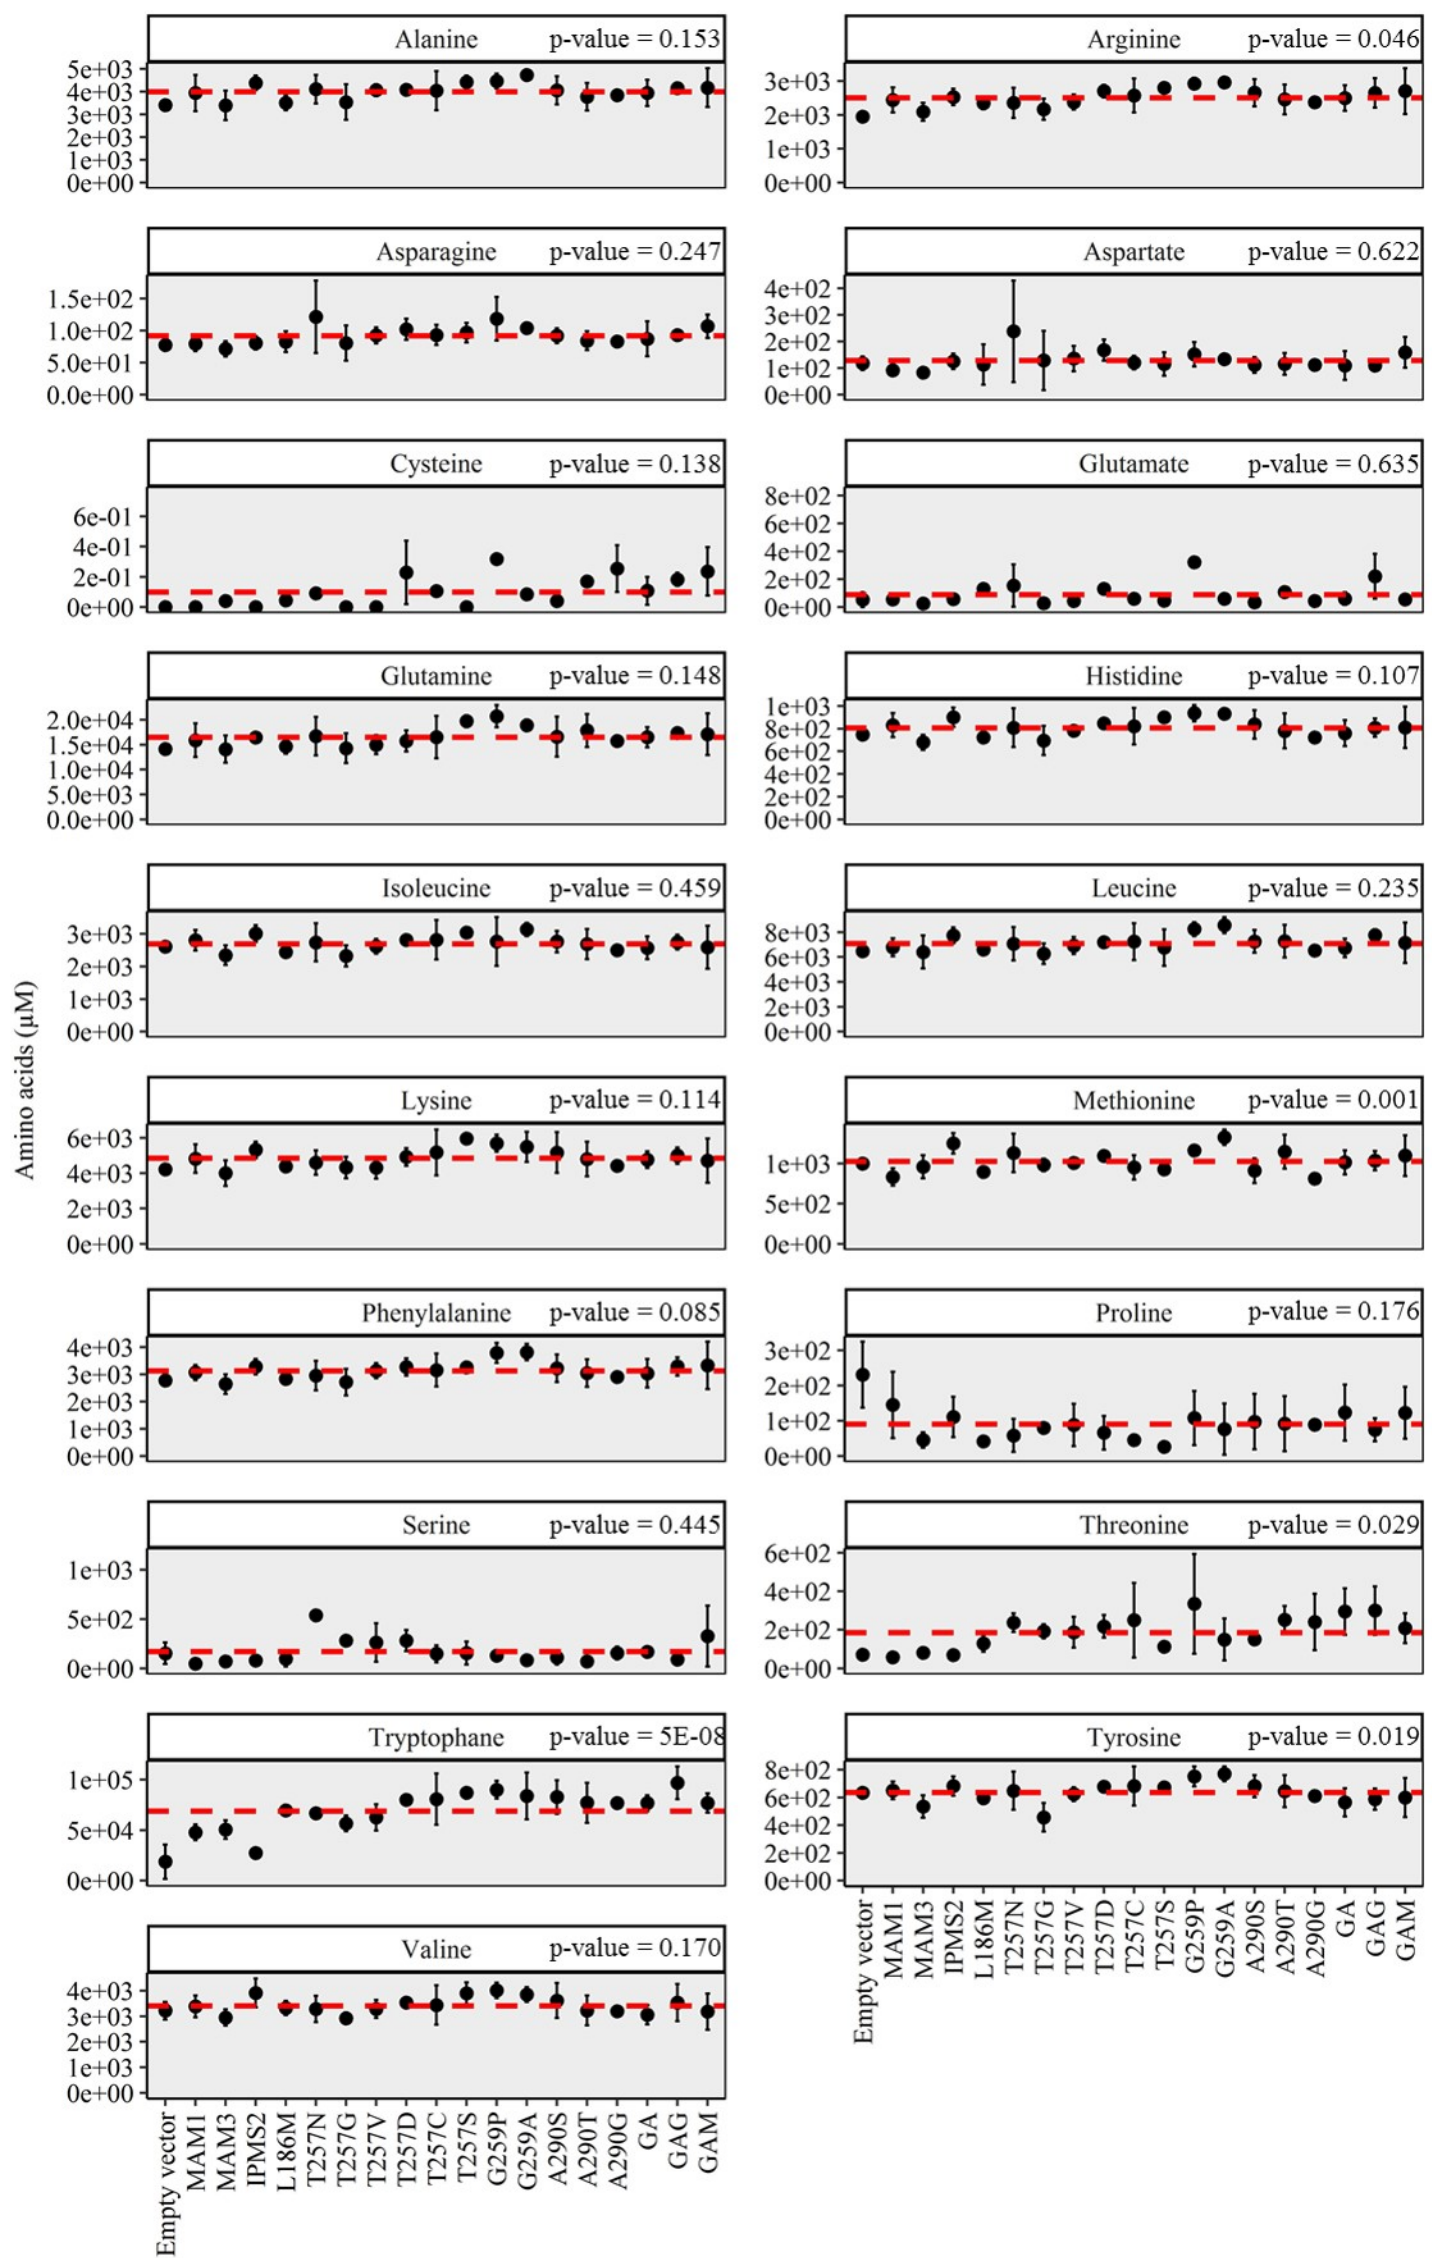

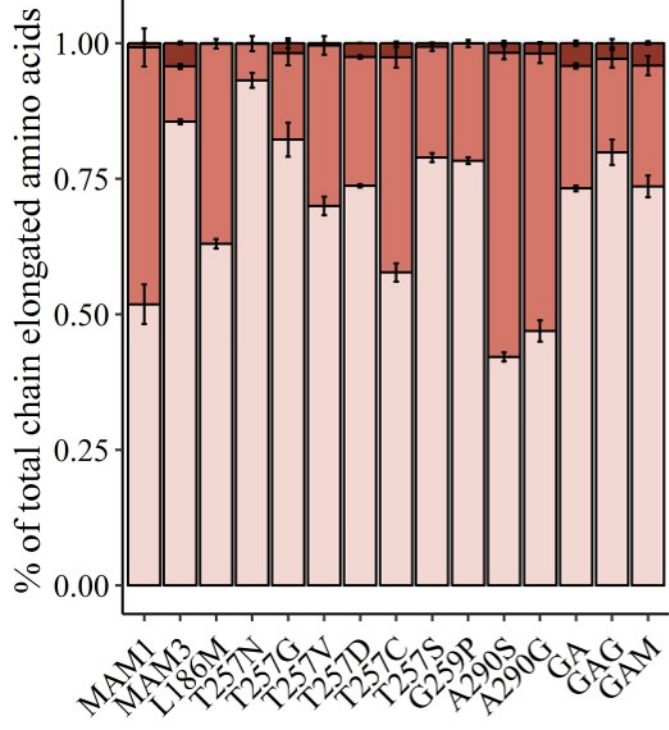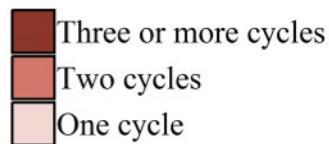

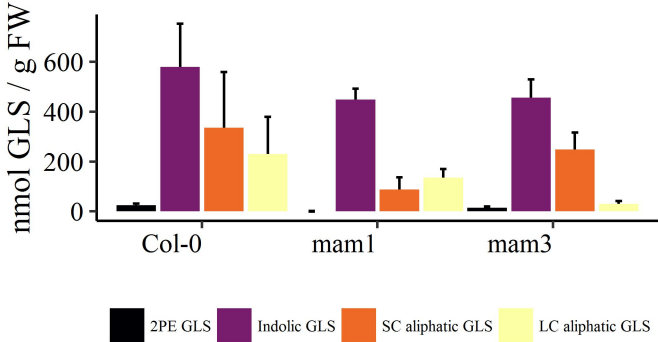





## Supplementary Figure legends

**Supplementary Figure S1.** Alignment of 57 MAM and 2 IPMS full protein sequences. According to *A. thaliana* MAM1 numbering, only Leu186, Thr257, Ile258, Gly259 and Ala290 residues are shown.

**Supplementary Figure S2.** Matrix from the alignment of MAM and IPMS enzyme sequences. Upper part indicates sequence similarity in percentage and the lower part shows differences between the protein sequences. Two MAM sequences have been removed from the matrix, as the comparison indicated low sequence similarity due to poor quality of the sequence data.

**Supplementary Figure S3.** LC-MS traces of homomethionine (HM), dihomomethionine (DHM), trihomomethionine (TriHM), tetrahomomethionine (TetraHM), pentahomomethionine (PentaHM) and hexahomomethionine (HexaHM). A representative sample of MAM1 and MAM3 containing strains as well as an empty vector control are shown. For each compound, the pure sample is shown in the top panel.

**Supplementary Figure S4.** LC-MS traces of heptahomomethionine (HeptaHM), homoleucine (HL) and homophenylalanine (HPhe). A representative sample of MAM1 and MAM3 containing strains as well as an empty vector control are shown. For each compound, the pure sample is shown in the top panel.

**Supplementary Figure S5.** Homology model of MAM1 from *A. thaliana*. (yellow) superimposed on the crystal structure of *N. meningitidis* IPMS (green). Only the  $(\beta/\alpha)_8$  catalytic barrel is shown. The RMSD value is 0.26 Å.

**Supplementary Figure S6.** Protein amino acids monitored in this study. Each graph shows levels of one amino acid in the media of *E. coli* strains expressing MAM variants and an empty vector control. The mean of all cultures is indicated by the red line. ANOVA was used to investigate changes in the individual amino acids between the cultures. p-values are shown in upper right corner of each graph. Data represents average and standard deviation of three biological replicates each grown in three technical replicates.

**Supplementary Figure S7.** Produced chain elongated amino acids were grouped according to how many methylene groups were added to the methionine, phenylalanine or leucine structures (one, two or three and above). Bars represents the percentage of each group of products relative to the total production within each culture. Data represents average and standard deviation of three biological replicates each grown in three technical replicates.

**Supplementary Figure S8.** Glucosinolate analysis in *A. thaliana* ecotype Col-0 and knockout mutants mam1 and mam3. Glucosinolates (GLS) were grouped into aromatic (2PE) GLSs, indole GLSs and short chain (SC – one to three elongation rounds) and long chain (LC – four elongation rounds and above) aliphatic GLSs. Data represents average and standard deviation of 3-7 biological replicates.

**Supplementary Figure S9.** Protein levels in *E. coli* strains expressing the chain elongation pathway genes, A) *BCAT4*, B) *MAM1*, C) *LSU1*, D) *MAM3*, E) *SSU3*, F) *IPMS2* and G) *IPMDH1* and H) *E. coli* housekeeping gene *ICD*. A-G are normalized the *ICD*, while the *ICD* is not normalized. Different colours indicate individual peptides within each protein. Data represents average and standard deviation of three biological replicates.

## Supplementary Tables

**Supplementary Table S1.** List of primers used in this study. Lower case letters denotes the USER tail used for cloning. Uracils are marked in blue. Mutated nucleotides are marked in red.

| Name          | Sequence                                                      | Description                                  |
|---------------|---------------------------------------------------------------|----------------------------------------------|
| MAM1_fwd      | ggcttaa <u>u</u> ATGCATCACCACCACCATCACAACACTATGTGCGTGTATTC    | <i>MAM1</i> forward primer                   |
| BCAT4_rev     | ggttta <u>u</u> TCAGCCCTGGCGGTC AAT                           | <i>BCAT4</i> reverse primer                  |
| MAM3_fwd      | ggcttaa <u>u</u> ATGCATCACCACCACCATCACGCTGAGTCCAAAAAGGTGGC    | <i>MAM3</i> forward primer                   |
| MAM3_rev      | acaaaatta <u>u</u> TTCTAGAGGGGTTATACAACAGCGGAAATC             | <i>MAM3</i> reverse primer                   |
| IPMS2_fwd     | ggcttaa <u>u</u> ATGCATCACCACCACCATCACATGGAGTCTTCGATTCTCA     | <i>IPMS2</i> forward primer                  |
| IPMS2_rev     | acaaaatta <u>u</u> TTCTAGAGGGGTCAGGCAGGGACTTCGTTG             | <i>IPMS2</i> reverse primer                  |
| L186_fwd      | acatctactag <u>u</u> GACATTCACATGAAATATAAG                    | Fusion primer for <i>L186</i> -mutant        |
| L186M_rev     | actagtagatg <u>u</u> GAATAC <b>CAT</b> TATCCTTGGCCTC          | Fusion primer for <i>L186M</i> -mutant       |
| T257/G259_fwd | acgtaggg <u>u</u> CAACATGCCACATGAATACGG                       | Fusion primer for <i>T257</i> -mutant        |
| T257N_rev     | atccctaccg <u>u</u> ATCACCGAT <b>GTT</b> CACCACCGTAA          | Fusion primer for <i>T257N</i> -mutant       |
| T257G_rev     | atccctaccg <u>u</u> ATCACCGAT <b>GCC</b> CACCACCGTAA          | Fusion primer for <i>T257G</i> -mutant       |
| T257V_rev     | atccctaccg <u>u</u> ATCACCGAT <b>GAC</b> CACCACCGTAA          | Fusion primer for <i>T257V</i> -mutant       |
| T257D_rev     | atccctaccg <u>u</u> ATCACCGAT <b>GTC</b> CACCACCGTAA          | Fusion primer for <i>T257D</i> -mutant       |
| T257C_rev     | atccctaccg <u>u</u> ATCACCGAT <b>GCA</b> CACCACCGTAA          | Fusion primer for <i>T257C</i> -mutant       |
| T257S_rev     | atccctaccg <u>u</u> ATCACCGAT <b>GCT</b> CACCACCGTAA          | Fusion primer for <i>T257S</i> -mutant       |
| G259P_rev     | atccctaccg <u>u</u> ATC <b>TGG</b> GATGGTCACCACCGTAA          | Fusion primer for <i>G259P</i> -mutant       |
| G259A_rev     | atccctaccg <u>u</u> ATC <b>GGC</b> GATGGTCACCACCGTAA          | Fusion primer for <i>G259A</i> -mutant       |
| A290S_fwd     | acgatggtg <u>u</u> <b>CAGC</b> GTTCATTGTCACAACGAC             | Fusion primer for <i>A290S</i> -mutant       |
| A290T_fwd     | acgatggtg <u>u</u> <b>CACC</b> GTTCATTGTCACAACGAC             | Fusion primer for <i>A290T</i> -mutant       |
| A290G_fwd     | acgatggtg <u>u</u> <b>CGGC</b> GTTCATTGTCACAACGAC             | Fusion primer for <i>A290G</i> -mutant       |
| A290_rev      | acgacaacatc <u>u</u> CAATTCCAGGGGTGTTTGCTTTG                  | Fusion primer for <i>A290</i> -mutant        |
| GA_rev        | atccctaccg <u>u</u> ATC <b>GGC</b> GAT <b>GCC</b> CACCACCGTAA | Fusion primer for <i>T257G/G259A</i> -mutant |

**Supplementary Table S2.** Transitions and response factors used to quantify levels of chain elongated amino acids. Response factors of methionine- and leucine-derived products were reported in (20).

| Amino acid     | Q1    | Q3                  | CE  | Internal standard | Q1    | Q3    | Response factor |
|----------------|-------|---------------------|-----|-------------------|-------|-------|-----------------|
| <b>HPhe</b>    | 180.1 | 91.1 <sup>Qt</sup>  | -22 | 13C,15N-Phe       | 176.2 | 129.2 | 1.61            |
|                | 180.1 | 134.1               | -8  |                   |       |       |                 |
|                | 180.1 | 117.1               | -13 |                   |       |       |                 |
| <b>HM</b>      | 164.2 | 70.3 <sup>Qt</sup>  | -16 | 13C,15N-Val       | 124.1 | 77.2  | 0.35            |
| <b>DHM</b>     | 178.2 | 84.2 <sup>Qt</sup>  | -14 | 13C,15N-Phe       | 176.2 | 129.2 | 1.05            |
|                | 178.2 | 132.1               | -10 |                   |       |       |                 |
| <b>TriHM</b>   | 192.2 | 98.2 <sup>Qt</sup>  | -14 | 13C,15N-Phe       | 176.2 | 129.2 | 1.25            |
|                | 192.2 | 146.1               | -9  |                   |       |       |                 |
| <b>TetraHM</b> | 206.2 | 112.2 <sup>Qt</sup> | -13 | 13C,15N-Phe       | 176.2 | 129.2 | 0.91            |
|                | 206.2 | 160.1               | -10 |                   |       |       |                 |
| <b>PentaHM</b> | 220.3 | 126.2 <sup>Qt</sup> | -16 | 13C,15N-Phe       | 176.2 | 129.2 | 0.41            |
|                | 220.3 | 174.1               | -10 |                   |       |       |                 |
| <b>HexaHM</b>  | 234.4 | 140.2 <sup>Qt</sup> | -16 | 13C,15N-Phe       | 176.2 | 129.2 | 0.36            |
|                | 234.4 | 188.1               | -11 |                   |       |       |                 |
| <b>HeptaHM</b> | 248.2 | 188.1 <sup>Qt</sup> | -10 | 13C,15N-Phe       | 176.2 | 129.2 | n.d.            |
|                | 148.2 | 154.1               | -16 |                   |       |       |                 |
| <b>HL</b>      | 146.2 | 100.1               | 10  | 13C,15N-Phe       | 176.2 | 129.2 | 0.88            |
| <b>DHL</b>     | 160.2 | 114.1               | -10 | 13C,15N-Phe       | 176.2 | 129.2 | 1.00*           |
| <b>TriHL</b>   | 174.2 | 128.1               | -10 | 13C,15N-Phe       | 176.2 | 129.2 | 1.00*           |

\*Response factors for DHL and TriHL were assumed to be 1.00. CE = collision energy. Q = quadrupole. Qt = quantifier transition

**Supplemental Table S3:** Transitions used for Selected Reaction Monitoring (SRM) for targeted proteomics on peptides of methionine chain elongation pathway proteins. Retention times and parent ion to fragment ion transitions are given. All peptides were selected in Q1 as the double-charged ions  $[M+H]^{2+}$  and fragment ions in Q3 as single-charged ions  $[M+H]^+$ . Collision energies (CE) for natural non-labelled (light) and isotopically labelled (heavy) peptides were identical.

| Protein name    | AGI code  | Peptide             | RT     | Light peptide      |                 | Heavy peptide      |                 | CE  |
|-----------------|-----------|---------------------|--------|--------------------|-----------------|--------------------|-----------------|-----|
|                 |           |                     |        | Q1<br>$[M+H]^{2+}$ | Q3<br>$[M+H]^+$ | Q1<br>$[M+H]^{2+}$ | Q3<br>$[M+H]^+$ |     |
| BCAT4           | At3g19710 | TGEETLAAK           | 1.60   | 460.25             | 761.42          | 464.25             | 769.42          | -13 |
|                 |           |                     | 1.60   | 460.25             | 818.44          | 464.25             | 826.44          | -15 |
|                 |           |                     | 1.60   | 460.25             | 632.38          | 464.25             | 640.38          | -14 |
|                 |           | LYETLSDIQTGR*       | 8.30   | 698.36             | 776.4           | 703.36             | 786.4           | -19 |
|                 |           |                     | 8.30   | 698.36             | 990.53          | 703.36             | 1000.53         | -26 |
|                 |           |                     | 8.30   | 698.36             | 1119.57         | 703.36             | 1129.57         | -23 |
|                 |           | SITNYCPVWIPLAEAK    | 18.70  | 931.49             | 927.54          | 935.49             | 935.54          | -3  |
|                 |           |                     | 18.70  | 931.49             | 1123.67         | 935.49             | 1131.67         | -29 |
|                 |           |                     | 18.70  | 931.49             | 628.38          | 935.49             | 636.38          | -41 |
|                 |           | GNVVSTPTIAGTILPGVTR | 16.50  | 927.03             | 529.32          | 932.03             | 539.32          | -29 |
|                 |           |                     | 16.50  | 927.03             | 642.4           | 932.03             | 652.4           | -28 |
|                 |           |                     | 16.50  | 927.03             | 642.4           | 932.03             | 652.4           | -28 |
| MAM1            | At5g23010 | SLGFNDIQFGCEDGGR*   | 13.60  | 886.39             | 897.36          | 891.39             | 907.36          | -31 |
|                 |           |                     | 13.60  | 886.39             | 1025.42         | 891.39             | 1035.42         | -33 |
|                 |           |                     | 13.60  | 886.39             | 404.2           | 891.39             | 414.2           | -41 |
|                 |           | DGEQSPGGS LTPPQK    | 2.50   | 749.37             | 981.55          | 753.37             | 989.55          | -23 |
|                 |           |                     | 2.50   | 749.37             | 1068.58         | 753.37             | 1076.58         | -25 |
|                 |           |                     | 2.50   | 749.37             | 469.29          | 753.37             | 477.29          | -30 |
|                 |           | STYEILSPEDIGIVK     | 17.00  | 832.45             | 957.54          | 836.45             | 965.54          | -22 |
|                 |           |                     | 17.00  | 832.45             | 870.51          | 836.45             | 878.51          | -25 |
|                 |           |                     | 17.00  | 832.45             | 1070.62         | 836.45             | 1078.62         | -24 |
|                 |           | SGNASLEEVVMALK      | 17.50  | 724.38             | 918.51          | 728.38             | 1126.63         | -24 |
|                 |           |                     | 17.50  | 724.38             | 1118.63         | 728.38             | 1039.59         | -24 |
|                 |           |                     | 17.50  | 724.38             | 1031.59         | 728.38             | 926.51          | -23 |
| MAM3            | At5g23020 | GESLMDGVYTK         | 6.70   | 600.29             | 813.4           | 604.29             | 821.4           | -19 |
|                 |           |                     | 6.70   | 600.29             | 1013.51         | 604.29             | 1021.51         | -16 |
|                 |           |                     | 6.70   | 600.29             | 682.35          | 604.29             | 690.35          | -19 |
|                 |           | ALVVNGAEISSEK       | 5.70   | 658.86             | 934.46          | 662.86             | 942.46          | -20 |
|                 |           |                     | 5.70   | 658.86             | 1033.53         | 662.86             | 1041.53         | -20 |
|                 |           |                     | 5.70   | 658.86             | 820.42          | 662.86             | 828.42          | -21 |
|                 |           | SGNAPLEEVVMALK      | 18.70  | 729.39             | 1128.65         | 733.39             | 1136.65         | -21 |
|                 |           |                     | 18.70  | 729.39             | 918.51          | 733.39             | 926.51          | -25 |
|                 |           |                     | 18.70  | 729.39             | 588.4           | 733.39             | 596.4           | -23 |
|                 |           | STYEILSPEDVGIVK*    | 15.50  | 825.44             | 943.52          | 829.44             | 951.52          | -23 |
|                 |           |                     | 15.50  | 825.44             | 856.49          | 829.44             | 864.49          | -23 |
|                 |           |                     | 15.50  | 825.44             | 1056.61         | 829.44             | 1064.61         | -25 |
| DGEQSPGAALTPPQK | 3.40      | 748.38              | 469.29 | 752.38             | 477.29          | -32                |                 |     |
|                 | 3.40      | 748.38              | 372.24 | 752.38             | 380.24          | -41                |                 |     |

|           |           |                   |       |        |         |        |         |     |
|-----------|-----------|-------------------|-------|--------|---------|--------|---------|-----|
|           |           |                   | 3.40  | 748.38 | 979.57  | 752.38 | 987.57  | -24 |
| IPMS2     | At1g74040 | GTYEIMSPPEEIGLER* | 15.40 | 889.94 | 1102.53 | 894.94 | 1112.53 | -28 |
|           |           |                   | 15.40 | 889.94 | 942.5   | 894.94 | 952.5   | -32 |
| IPMI-LSU1 | At4g13430 | FILDGEMPSYLQAK*   | 16.90 | 806.42 | 806.45  | 810.42 | 814.45  | -26 |
|           |           |                   | 16.90 | 806.42 | 937.5   | 810.42 | 945.5   | -24 |
|           |           |                   | 16.90 | 806.42 | 1123.56 | 810.42 | 1131.56 | -24 |
|           |           | VWMDVYALPVPAGGK   | 18.50 | 830.44 | 682.4   | 834.44 | 690.4   | -21 |
|           |           |                   | 18.50 | 830.44 | 486.28  | 834.44 | 494.28  | -37 |
|           |           |                   | 18.50 | 830.44 | 261.17  | 834.44 | 269.17  | -49 |
| IPMI-SSU3 | At3g58990 | LGSFALNGLPK       | 12.60 | 558.83 | 712.45  | 562.83 | 720.45  | -19 |
|           |           |                   | 12.60 | 558.83 | 1003.57 | 562.83 | 1011.57 | -18 |
|           |           |                   | 12.60 | 558.83 | 641.41  | 562.83 | 649.41  | -17 |
|           |           | EDGSLLINHTTR      | 3.90  | 721.87 | 854.49  | 726.87 | 864.49  | -29 |
|           |           |                   | 3.90  | 721.87 | 967.58  | 726.87 | 977.58  | -29 |
|           |           |                   | 3.90  | 721.87 | 741.41  | 726.87 | 751.41  | -28 |
|           |           | NCVATGEIFPLESEVR* | 15.10 | 910.95 | 829.45  | 915.95 | 839.45  | -30 |
|           |           |                   | 15.10 | 910.95 | 976.52  | 915.95 | 986.52  | -30 |
|           |           |                   | 15.10 | 910.95 | 490.27  | 915.95 | 500.27  | -37 |
| IPMDH1    | At5g14200 | LSDAILLGAIGGYK*   | 17.00 | 695.91 | 891.54  | 699.91 | 899.54  | -19 |
|           |           |                   | 17.00 | 695.91 | 778.46  | 699.91 | 786.46  | -20 |
|           |           |                   | 17.00 | 695.91 | 1004.63 | 699.91 | 1012.63 | -22 |
|           |           | AGSLEGLEFDFK      | 14.20 | 656.83 | 855.44  | 660.83 | 863.44  | -20 |
|           |           |                   | 14.20 | 656.83 | 984.48  | 660.83 | 992.48  | -18 |
|           |           |                   | 14.20 | 656.83 | 685.33  | 660.83 | 693.33  | -17 |
|           |           | IEDAVVDALNK       | 6.05  | 593.83 | 944.52  | 597.83 | 952.52  | -17 |
|           |           |                   | 6.05  | 593.83 | 659.39  | 597.83 | 667.39  | -17 |
|           |           |                   | 6.05  | 593.83 | 758.45  | 597.83 | 766.45  | -17 |
| ICD       | JW1122    | GPLTTPVGGGIR*     | 6.37  | 562.83 | 655.40  | 567.83 | 665.40  | -20 |
|           |           |                   | 6.37  | 562.83 | 857.49  | 567.83 | 867.49  | -21 |
|           |           |                   | 6.37  | 562.83 | 756.44  | 567.83 | 766.44  | -19 |

\*= peptides represented in Figure 8.



**Supplemental Table S4:** Pairwise t-test of the methionine levels from media of *E. coli* strains expression the chain elongation pathway with 18 different MAM variants and an empty vector control. p-values shown.

|       | Empty<br>vector | MAM1    | MAM3   | IPMS2  | L186M  | T257N  | T257G  | T257V  | T257D  | T257C  | T257S  | G259P  | G259A   | A290S  | A290T  | A290G  | GA     | GAG    |
|-------|-----------------|---------|--------|--------|--------|--------|--------|--------|--------|--------|--------|--------|---------|--------|--------|--------|--------|--------|
| MAM1  | 0.1316          | -       | -      | -      | -      | -      | -      | -      | -      | -      | -      | -      | -       | -      | -      | -      | -      | -      |
| MAM3  | 0.7101          | 0.2507  | -      | -      | -      | -      | -      | -      | -      | -      | -      | -      | -       | -      | -      | -      | -      | -      |
| IPMS2 | 0.0254          | 0.0004  | 0.5510 | -      | -      | -      | -      | -      | -      | -      | -      | -      | -       | -      | -      | -      | -      | -      |
| L186M | 0.3535          | 0.0103  | 0.5755 | 0.0023 | -      | -      | -      | -      | -      | -      | -      | -      | -       | -      | -      | -      | -      | -      |
| T257N | 0.2301          | 0.0088  | 0.1192 | 0.2755 | 0.0372 | -      | -      | -      | -      | -      | -      | -      | -       | -      | -      | -      | -      | -      |
| T257G | 0.8806          | 0.1727  | 0.8245 | 0.0178 | 0.4355 | 0.1784 | -      | -      | -      | -      | -      | -      | -       | -      | -      | -      | -      | -      |
| T257V | 0.9379          | 0.1136  | 0.6532 | 0.0305 | 0.3152 | 0.2609 | 0.8196 | -      | -      | -      | -      | -      | -       | -      | -      | -      | -      | -      |
| T257D | 0.3792          | 0.0199  | 0.2139 | 0.1591 | 0.0752 | 0.7432 | 0.3045 | 0.4223 | -      | -      | -      | -      | -       | -      | -      | -      | -      | -      |
| T257C | 0.6634          | 0.2773  | 0.9491 | 0.0087 | 0.6195 | 0.1055 | 0.7753 | 0.6080 | 0.1920 | -      | -      | -      | -       | -      | -      | -      | -      | -      |
| T257S | 0.5230          | 0.3757  | 0.7885 | 0.0051 | 0.7698 | 0.0700 | 0.6245 | 0.4740 | 0.1332 | 0.8379 | -      | -      | -       | -      | -      | -      | -      | -      |
| G259P | 0.1362          | 0.0040  | 0.0655 | 0.4266 | 0.0185 | 0.7637 | 0.1024 | 0.1569 | 0.5307 | 0.0572 | 0.0366 | -      | -       | -      | -      | -      | -      | -      |
| G259A | 0.0043          | 4.9e-05 | 0.0016 | 0.4823 | 0.0003 | 0.0773 | 0.0029 | 0.0053 | 0.0383 | 0.0013 | 0.0007 | 0.1385 | -       | -      | -      | -      | -      | -      |
| A290S | 0.4230          | 0.4693  | 0.6657 | 0.0033 | 0.8977 | 0.0494 | 0.5140 | 0.3799 | 0.0974 | 0.7125 | 0.8695 | 0.0251 | 0.0005  | -      | -      | -      | -      | -      |
| A290T | 0.1735          | 0.0057  | 0.0862 | 0.3536 | 0.0254 | 0.8680 | 0.1323 | 0.1985 | 0.6218 | 0.0758 | 0.0492 | 0.8930 | 0.1075  | 0.0342 | -      | -      | -      | -      |
| A290G | 0.0920          | 0.8519  | 0.1836 | 0.0002 | 0.4347 | 0.0054 | 0.1229 | 0.0786 | 0.0126 | 0.2048 | 0.2851 | 0.0024 | 2.8e-05 | 0.3639 | 0.0035 | -      | -      | -      |
| GA    | 0.8826          | 0.0993  | 0.6039 | 0.0357 | 0.2834 | 0.2909 | 0.7659 | 0.9444 | 0.4632 | 0.5604 | 0.4326 | 0.1776 | 0.0064  | 0.3438 | 0.2232 | 0.0681 | -      | -      |
| GAG   | 0.7299          | 0.0666  | 0.4745 | 0.0552 | 0.2058 | 0.3888 | 0.6206 | 0.7891 | 0.5911 | 0.4364 | 0.3272 | 0.2475 | 0.0106  | 0.2541 | 0.3053 | 0.0446 | 0.8432 | -      |
| GAM   | 0.3673          | 0.0189  | 0.2059 | 0.1656 | 0.0718 | 0.7602 | 0.2943 | 0.4096 | 0.9821 | 0.1847 | 0.1278 | 0.5454 | 0.0403  | 0.0931 | 0.6377 | 0.0119 | 0.4498 | 0.5758 |
